# Supplementary material
Source: HighWire-hosted journal article supplement (https://jnis.bmj.com/content/10/12/e31)
Supplement: inline-supplementary-material-1 [file inline-supplementary-material-1.docx]

**Supplementary table 1. Univariate regression model predicting successful recanalization (TICI 2b/3) after first device**

|  | **OR** | **95% CI** | **P-Value** |
| --- | --- | --- | --- |
| Age | 0.99 | 0.97 – 1.02 | 0.99 |
| Male sex | 0.56 | 0.30 – 1.07 | 0.08 |
| aHT | 0.87 | 0.43 – 1.73 | 0.69 |
| DM | 2.14 | 0.77 – 5.97 | 0.15 |
| Dyslipidemia | 1.14 | 0.59 – 2.21 | 0.69 |
| Active Smoking | 1.13 | 0.56 – 2.29 | 0.73 |
| NIHSS on admission | 0.98 | 0.94 – 1.02 | 0.43 |
| Stroke etiology |  |  |  |
| Large artery atherosclerosis | 0.66 | 0.30 – 1.43 | 0.29 |
| Cardiac embolism | 0.86 | 0.46 – 1.61 | 0.64 |
| Other determined etiology | 2.30 | 0.31 – 3.21 | 0.79 |
| Undetermined etiology | 2.11 | 0.99 – 4.91 | 0.09 |
| IVT | 1.18 | 0.63 – 2.22 | 0.61 |
| Side of occlusion |  |  |  |
| Tandem ICA/MCA | 0.72 | 0.13 – 3.14 | 0.66 |
| Intracranial internal carotid artery | 1.33 | 0.14 – 13.07 | 0.81 |
| Carotid-T | 0.46 | 0.22 – 0.99 | 0.047 |
| MCA M1 | 1.41 | 0.75 – 2.64 | 0.29 |
| MCA M2 | 1.40 | 0.61 – 3.23 | 0.42 |
| General anesthesia | 0.79 | 0.41 – 1.55 | 0.79 |
| Additional cervical ICA stent | 1.20 | 0.44 – 3.25 | 0.72 |
| Time from last seen well to groin puncture | 0.99 | 0.99 – 1.00 | 0.99 |
| ERIC used as first device | 3.49 | 1.77 – 6.88 | <0.001 |

**Supplementary table 2. Univariate regression model predicting favorable outcome (mRS 0-2) at 90d follow-up**

|  | **OR** | **95% CI** | **P-Value** |
| --- | --- | --- | --- |
| Age | 0.95 | 0.93 – 0.97 | <0.001 |
| Male sex | 1.13 | 0.63 – 2.03 | 0.69 |
| aHT | 0.75 | 0.39 – 1.42 | 0.37 |
| DM | 0.77 | 0.33 – 1.79 | 0.55 |
| Dyslipidemia | 1.22 | 0.66 – 2.25 | 0.52 |
| Active Smoking | 1.42 | 0.74 – 2.69 | 0.28 |
| NIHSS on admission | 0.84 | 0.78 – 0.89 | <0.001 |
| Stroke etiology |  |  |  |
| Large artery atherosclerosis | 0.94 | 0.44 - 2.01 | 0.88 |
| Cardiac embolism | 0.76 | 0.43 – 1.37 | 0.36 |
| Other determined etiology | 1.41 | 0.53 – 3.74 | 0.49 |
| Undetermined etiology | 1.31 | 0.64 – 2.65 | 0.45 |
| IVT | 0.67 | 0.37 – 1.2 | 0.20 |
| Side of occlusion |  |  |  |
| Tandem ICA/MCA | 2.36 | 0.55 – 10.19 | 0.25 |
| Intracranial internal carotid artery | 4.22 | 0.43 – 41.33 | 0.22 |
| Carotid-T | 0.13 | 0.04 – 0.37 | <0.001 |
| MCA M1 | 1.05 | 0.58 – 1.89 | 0.87 |
| MCA M2 | 3.01 | 1.41 – 6.43 | 0.004 |
| General anesthesia | 0.15 | 0.07 – 0.33 | <0.001 |
| Additional cervical ICA stent | 0.47 | 0.17 – 1.26 | 0.14 |
| Time from last seen well to groin puncture | 0.99 | 0.99 – 1.01 | 0.55 |
| Time from last seen well to recanalization |  |  |  |
| Time from groin puncture to recanalization [min] – all | 0.98 | 0.97 – 0.99 | <0.001 |
| Time from groin puncture to recanalization [min] – TICI 2b/3 final only | 0.98 | 0.97 – 0.99 | 0.003 |
| Time from groin puncture to recanalization [min] – TICI 2b/3 after 1st device | 0.98 | 0.97 – 0.99 | 0.003 |
| ERIC used as first device | 1.87 | 1.03 – 3.4 | 0.039 |
| Total no of passes | 0.47 | 0.34 – 0.67 | <0.001 |
| TICI 2b/3 after 1st device | 4.49 | 2.13 – 9.49 | <0.001 |
| TICI 2b/3 final | 3.50 | 1.35 – 9.06 | 0.01 |
